# Supplementary material
Source: HighWire-hosted journal article supplement (https://ijssurgery.com/content/17/5/698)
Supplement: inline-supplementary-material-1 [file inline-supplementary-material-1.docx]

**Supplementary material**

| patient ident | level lesion | complete/incomplete | active sitting* | ASIA | age |
| --- | --- | --- | --- | --- | --- |
| 1 | sub Th11 | complete | 2 | A | 48 |
| 2 | sub Th10 | complete | 2 | A | 25 |
| 3 | sub C5 | incomplete | 2 | B | 47 |
| 4 | sub C2 | incomplete | 1 | C | 74 |
| 5 | sub Th 10 | incomplete | 2 | C | 48 |
| 6 | sub Th2 | incomplete | 2 | C | 59 |
| 7 | sub C4 | incomplete | 1 | C | 47 |
| 8 | sub C7 | complete | 1 | A | 59 |
| 9 | sub Th4 | complete | 2 | A | 49 |
| 10 | sub L1 | complete | 2 | A | 40 |
| 11 | sub Th2 | incomplete | 2 | D | 24 |
| 12 | sub Th11 | complete | 2 | A | 55 |
| 13 | sub Th 2 | complete | 2 | A | 57 |
| 14 | sub C5 | incomplete | 2 | D | 57 |
| 15 | sub Th4 | complete | 2 | A | 48 |
| 16 | sub Th10 | incomplete | 2 | D | 26 |
| 17 | sub Th3 | complete | 2 | A | 63 |
| 18 | sub C6 | incomplete | 1 | D | 39 |
| 19 | sub Th8 | incomplete | 2 | C | 25 |
| 20 | sub L1 | incomplete | 2 | B | 37 |
| 21 | sub Th12 | complete | 2 | A | 71 |
| 22 | sub Th11 | incomplete | 2 | C | 35 |
| 23 | sub Th 12 | incomplete | 2 | D | 45 |
| 24 | sub C3 | incomplete | 1 | D | 46 |
| 25 | sub Th 6/8 | complete | 2 | A | 60 |
| 26 | sub Th 4 | complete | 2 | A | 18 |
| 27 | sub Th 10 | complete | 2 | A | 80 |
| 28 | sub Th4 | incomplete | 2 | D | 20 |
| 29 | sub Th4 | incomplete | 1 | C | 50 |
| 30 | sub C6 | incomplete | 2 | C | 39 |
| 31 | sub Th 6 | complete | 2 | A | 24 |
| 32 | sub C5 | incomplete | 2 | B | 73 |
| 33 | sub Th3 | incomplete | 2 | C | 80 |
| 34 | sub C5 | incomplete | 2 | C | 46 |

Table Participants characteristics

**1 means no; 2 means yes*
